# Supplementary material for: Physiological changes and gene responses during Ganoderma lucidum growth with selenium supplementation
Source: PeerJ journal article supplement (doi:10.7717/peerj.14488), 2022-12-20
Supplement: Fig._S1.pdf [file Fig._S1.pdf]

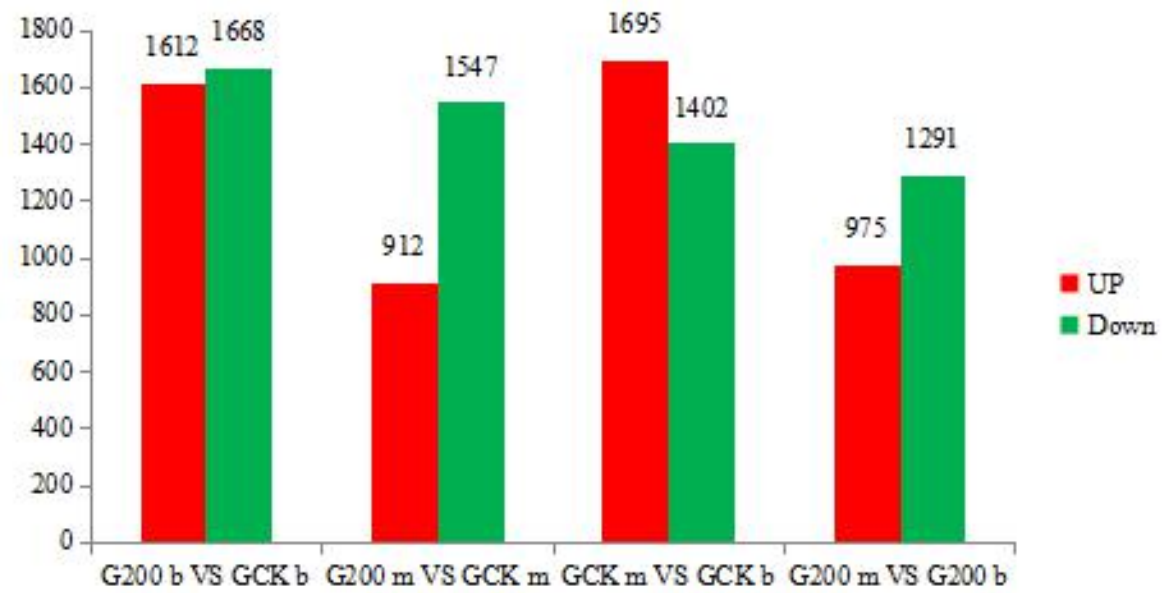

**Fig. S1 Gene number investigation in different treatments at different growth stages**
