# Supplementary material for: Physiological changes and gene responses during Ganoderma lucidum growth with selenium supplementation
Source: PeerJ. 2022 Dec 20;10:e14488. doi: 10.7717/peerj.14488 (PMC9784338; doi:10.7717/peerj.14488)
Supplement: Supplemental Information 2 [file peerj-10-14488-s002.xls]

## Sheet: Sheet1
G. lucidum				mm
	date 1	date 2	NO.	duplicate 1	duplicate 2	duplicate 3	duplicate 4	duplicate 5	duplicate 6	duplicate 7	duplicate 8	duplicate 9	duplicate 10	duplicate 11	duplicate 12	days
	May 5th	May 17th	CK	57.1	66.3	61.7	65.7	60.5	72.3	60.8	67.5	59	62	61.2		12	63.1	5.25833
	May 5th	May 17th	50	63	68.5	70.1	60.8	61	64.2	68.3	68.5	63.2	68.2	63	65	12	65.3167	5.44306
	May 5th	May 17th	100	74.2	77.9	70.6	82.1	80	82.9	69.2	68.7	81.5	78.1			12	76.52	6.37667
	May 11th	May 17th	200	33.2	33.5	32.1	37.3	35.5	39.4	36.2	33.6	33.1	31.2			6	34.51	5.75167
	May 11th	May 17th	250	26.5	32.9	34.1	31.8	33	80.1	34.7	34.5	72.9	28.1			6	40.86	6.81
	May 5th	May 17th	300	65	58	69.1	62.3	62	62.3	67.4	66.2	70.3	62.3			12	64.49	5.37417

## Sheet: Sheet2
	the yield per bag in the second sampling			the yield per bag in the second sampling
NO.	the fresh yield per bag/g	the dry yield per bag/g	NO.	the fresh yield per bag/g
Se-CK-1	604.8		Se-300-3	77
Se-CK-2	724.3	262	Se-50-1	75
Se-CK-3	525.7	185.8	Se-200-2	23
Se-50-1	157	79.5	Se-CK-1	66
Se-50-2	331.3	152.1	Se-300-1	41
Se-50-3	287.9	158.6	Se-250-1	142
Se-100-1	116.2	49.3	Se-250-3	65
Se-100-2	163.6	80.1	Se-300-2	204
Se-100-3	96	37.9	Se-CK-3	48
Se-200-1	693.8	250.3
Se-200-2	633.5	235
Se-200-3	874.3	328
Se-250-1	334.7	138.5
Se-250-2	411.7	187.8
Se-250-3	629.5	251.5
Se-300-1	597.3	216.6
Se-300-2	454.5	161.6
Se-300-3	689.9	235.8

## Sheet: Sheet3
NO.	bag weight/g	bag amount	the fresh yield per bag/g		average	dry yield	water content	Length1 mm	Thickness1 mm	Transverse diameter1 mm	longitudinal diameter1 mm	Length2 mm	Thickness2 mm	Transverse diameter2 mm	longitudinal diameter2 mm	Length3 mm	Thickness3 mm	Transverse diameter3 mm	longitudinal diameter3 mm
SeCK-1	9.55	23	1819.7	1810.15	78.7022	572.7	0.683617	40.96	2451	91.43	61.57	30.7	25.92	85.84	58.2	31.98	24.27	86.95	54.12
SeCK-2	9.55	23	1660.3	1650.75	71.7717	535.5	0.675602	27.32	2245	89.47	53.72	19.8	18.66	71.64	52.29	25.64	21.39	90.55	67.45
SeCK-3	9.55	18	1473.3	1463.75	81.3194	460	0.685739	38.29	2756	93.59	59.7	27.94	23.11	62.46	43.42	38.74	23.42	88.6	27.33
Se50-1	9.55	22	1947.3	1937.75	88.0795	682.3	0.647891	28.33	1677	79.3	16.63	35.44	18.25	75.83	45.54	35.48	18.42	77.25	49.41
Se50-2	9.55	23	2121.5	2111.95	91.8239	716.9	0.660551	37.67	1894	76.05	49.34	46.01	19.54	78.68	52.89	46.85	16.58	85.66	52.19
Se50-3	9.55	22	1975.2	1965.65	89.3477	670	0.659146	33.88	1765	83.77	49.35	33.96	15.32	87.92	56.3	37.72	16.21	69.26	44.88
Se100-1	5.15	5	334.9	329.75	65.95	120.5	0.634572	36.81	2247	87.82	61.69	29.9	19.51	100.58	67.7	25.12	19.16	102.55	68.58
Se100-2	5.15	6	494.4	489.25	81.5417	177.8	0.636587	28.9	2012	76.81	55.61	29.48	19.67	89.03	61.59	35.08	22.73	68.1	43.43
Se100-3	5.15	5	349.1	343.95	68.79	114.5	0.667103	28.91	2101	90.26	59.64	51.19	21.07	78.32	51.58	29.44	20.45	72.16	61.12
Se200-1	9.55	22	1866.1	1856.55	84.3886	599.5	0.677089	37.45	2099	80.99	45.93	35.59	20.43	83.94	58.88	36.1	18.45	80.85	53.55
Se200-2	9.55	21	1827.5	1817.95	86.569	586.7	0.677274	24.4	1804	84.58	53.07	22.92	19.83	96.02	61.71	33.57	25.25	86.42	64.09
Se200-3	9.55	22	2019.5	2009.95	91.3614	611.9	0.695565	47.37	2590	101.19	55.25	35.08	19.02	85.39	53.16	39.04	24.23	98.56	61.98
Se250-1	10.3	17	627.4	617.1	36.3	238	0.614325	33.64	2157	94.49	53.04	31.14	23.64	77.34	57.61	29.63	19.44	92.02	58.57
Se250-2	9.55	17	743.9	734.35	43.1971	229.8	0.68707	29.2	2016	106.56	83.6	28.5	24.11	103.13	70.53	33.43	15.81	108.85	91.24
Se250-3	9.55	19	1186.3	1176.75	61.9342	344.7	0.707075	41.98	1884	90.83	55.71	26.5	20.25	97.21	57.91	31.04	17.96	84.61	52.28
Se300-1	9.55	22	1659.9	1650.35	75.0159	524.6	0.682128	47.71	2349	82.82	49.86	41.19	22.45	83.33	50.22	35.84	20.36	80.91	49.2
Se300-2	9.55	22	1886.7	1877.15	85.325	575	0.693685	27.66	2480	91.54	63.9	36.98	23.89	93.12	57.24	35.98	21.47	81.13	47.1
Se300-3	9.55	22	1778.5	1768.95	80.4068	655.4	0.629498	10.56	2411	112.76	66.35	23.25	17.49	122.96	73.61	19.72	17.34	109.13	66.84

## Sheet: Sheet4
		the content of the triterpenoids
33	Se-CK	33	0.601996	1
34	Se-50		0.769596	1
35	Se-100		0.788037	1
36	Se-200	34	0.908718	2
37	Se-250		0.92179	2
38	Se-300		0.890278	2
		35	0.634909	3
			0.705404	3
			0.672491	3
		36	0.830987	4
			0.8625	4
			0.898915	4
		37	0.893779	5
			0.888177	5
			0.860166	5
		38	0.931828	6
			0.912687	6
			0.89658	6

## Sheet: Sheet5
NO.	NO.	concentration ug/mL			average ug/mL	correction index	Dilution multiple	the content of the crude polysaccharide %
		duplicate 1	duplicate 2	duplicate 3
33	Se-CK	10.1432	10.989	7.9898	9.70733	1.886	50	0.915402
34	Se-50	12.854	13.09	9.91	11.9513	1.886	50	1.12701
35	Se-100	7.698	7.677	9.423	8.266	1.886	50	0.779484
36	Se-200	13.4106	5.0326	12.965	10.4694	1.886	50	0.987264
37	Se-250	9.0406	9.2493	6.807	8.36563	1.886	50	0.788879
38	Se-300	11.177	11.866	13.807	12.2833	1.886	50	1.15832

## Sheet: Sheet6
Well	Reporter	S_Name	S_Type	Ct	Mean Ct	StdDev Ct	Gene
A1	SYBR GREEN	GCK2	Unknown Sample	34.23	34.2833	0.0757188	RPL4
A2	SYBR GREEN	GCK2	Unknown Sample	34.37	34.2833	0.0757188	RPL4
A3	SYBR GREEN	GCK2	Unknown Sample	34.25	34.2833	0.0757188	RPL4
A4	SYBR GREEN	GCK2	Unknown Sample	32.15	32.26	0.11	GL29881-G
A5	SYBR GREEN	GCK2	Unknown Sample	32.37	32.26	0.11	GL29881-G
A6	SYBR GREEN	GCK2	Unknown Sample	32.24	32.26	0.11	GL29881-G
B1	SYBR GREEN	G2002	Unknown Sample	21.93	21.8	0.14	RPL4
B2	SYBR GREEN	G2002	Unknown Sample	21.82	21.8	0.14	RPL4
B3	SYBR GREEN	G2002	Unknown Sample	21.65	21.8	0.14	RPL4
B4	SYBR GREEN	G2002	Unknown Sample	29.75	29.98	0.2	GL29881-G
B5	SYBR GREEN	G2002	Unknown Sample	30.14	29.98	0.2	GL29881-G
B6	SYBR GREEN	G2002	Unknown Sample	30.05	29.98	0.2	GL29881-G
C1	SYBR GREEN	GCK4	Unknown Sample	17.5	17.73	0.22	RPL4
C2	SYBR GREEN	GCK4	Unknown Sample	17.73	17.73	0.22	RPL4
C3	SYBR GREEN	GCK4	Unknown Sample	17.95	17.73	0.22	RPL4
C4	SYBR GREEN	GCK4	Unknown Sample	19.76	19.55	0.2	GL29881-G
C5	SYBR GREEN	GCK4	Unknown Sample	19.51	19.55	0.2	GL29881-G
C6	SYBR GREEN	GCK4	Unknown Sample	19.37	19.55	0.2	GL29881-G
D1	SYBR GREEN	G2004	Unknown Sample	17.19	17.4	0.19	RPL4
D2	SYBR GREEN	G2004	Unknown Sample	17.57	17.4	0.19	RPL4
D3	SYBR GREEN	G2004	Unknown Sample	17.42	17.4	0.19	RPL4
D4	SYBR GREEN	G2004	Unknown Sample	19.45	19.5	0.04	GL29881-G
D5	SYBR GREEN	G2004	Unknown Sample	19.52	19.5	0.04	GL29881-G
D6	SYBR GREEN	G2004	Unknown Sample	19.52	19.5	0.04	GL29881-G
G1	SYBR GREEN	GCK4	Unknown Sample	18.71	18.76	0.04	GL23172-G
G2	SYBR GREEN	GCK4	Unknown Sample	18.77	18.76	0.04	GL23172-G
G3	SYBR GREEN	GCK4	Unknown Sample	18.8	18.76	0.04	GL23172-G
H1	SYBR GREEN	G2004	Unknown Sample	19.65	19.75	0.38	GL23172-G
H2	SYBR GREEN	G2004	Unknown Sample	19.43	19.75	0.38	GL23172-G
H3	SYBR GREEN	G2004	Unknown Sample	20.17	19.75	0.38	GL23172-G
Well	Reporter	S_Name	S_Type	Ct	Mean Ct	StdDev Ct	Gene
B1	SYBR GREEN	GCK2	Unknown Sample	29.82	29.85	0.1	RPL4
B2	SYBR GREEN	GCK2	Unknown Sample	29.77	29.85	0.1	RPL4
B3	SYBR GREEN	GCK2	Unknown Sample	29.96	29.85	0.1	RPL4
B4	SYBR GREEN	G2002	Unknown Sample	22.34	22.4	0.13	RPL4
B5	SYBR GREEN	G2002	Unknown Sample	22.54	22.4	0.13	RPL4
B6	SYBR GREEN	G2002	Unknown Sample	22.31	22.4	0.13	RPL4
E1	SYBR GREEN	GCK2	Unknown Sample	29.75	29.56	0.46	GL23172-G
E2	SYBR GREEN	GCK2	Unknown Sample	29.89	29.56	0.46	GL23172-G
E3	SYBR GREEN	GCK2	Unknown Sample	29.03	29.56	0.46	GL23172-G
E4	SYBR GREEN	G2002	Unknown Sample	25.51	25.28	0.25	GL23172-G
E5	SYBR GREEN	G2002	Unknown Sample	25.02	25.28	0.25	GL23172-G
E6	SYBR GREEN	G2002	Unknown Sample	25.32	25.28	0.25	GL23172-G
Well	Reporter	S_Name	S_Type	Ct	Mean Ct	StdDev Ct	Gene
A1	SYBR GREEN	GCK2	Unknown Sample	30.03	30.03	0.02	RPL4
A2	SYBR GREEN	GCK2	Unknown Sample	30.02	30.03	0.02	RPL4
A3	SYBR GREEN	GCK2	Unknown Sample	30.05	30.03	0.02	RPL4
B1	SYBR GREEN	G2002	Unknown Sample	22.41	22.23	0.35	RPL4
B2	SYBR GREEN	G2002	Unknown Sample	22.46	22.23	0.35	RPL4
B3	SYBR GREEN	G2002	Unknown Sample	21.82	22.23	0.35	RPL4
C1	SYBR GREEN	GCK2	Unknown Sample	28.93	28.99	0.06	GL24625-G
C2	SYBR GREEN	GCK2	Unknown Sample	29.01	28.99	0.06	GL24625-G
C3	SYBR GREEN	GCK2	Unknown Sample	29.03	28.99	0.06	GL24625-G
D1	SYBR GREEN	G2002	Unknown Sample	32.29	32.38	0.13	GL24625-G
D2	SYBR GREEN	G2002	Unknown Sample	32.53	32.38	0.13	GL24625-G
D3	SYBR GREEN	G2002	Unknown Sample	32.33	32.38	0.13	GL24625-G
G1	SYBR GREEN	GCK2	Unknown Sample	31.09	31.24	0.15	GL28298-G
G2	SYBR GREEN	GCK2	Unknown Sample	31.26	31.24	0.15	GL28298-G
G3	SYBR GREEN	GCK2	Unknown Sample	31.38	31.24	0.15	GL28298-G
H1	SYBR GREEN	G2002	Unknown Sample	26.75	26.91	0.29	GL28298-G
H2	SYBR GREEN	G2002	Unknown Sample	26.74	26.91	0.29	GL28298-G
H3	SYBR GREEN	G2002	Unknown Sample	27.24	26.91	0.29	GL28298-G
